# Supplementary material for: Compound to Extract to Formulation: a knowledge-transmitting approach for metabolites identification of Gegen-Qinlian Decoction, a traditional Chinese medicine formula
Source: PubMed Central journal article supplement (PMC5171860; doi:10.1038/srep39534), 2016-12-20
Supplement: srep39534-s1.pdf [file srep39534-s1.pdf]

## **Supplementary Information**

### **Compound to Extract to Formulation: a knowledge-transmitting approach for metabolites identification of Gegen-Qinlian Decoction, a traditional Chinese medicine formula**

Xue Qiao, Qi Wang, Shuang Wang, Wen-juan Miao, Yan-jiao Li, Cheng Xiang, De-an Guo, and Min Ye\*

#### **Affiliation:**

State Key Laboratory of Natural and Biomimetic Drugs, School of Pharmaceutical Sciences, Peking University, 38 Xueyuan Road, Beijing 100191, China

#### **Correspondence**

State Key Laboratory of Natural and Biomimetic Drugs, School of Pharmaceutical Sciences, Peking University, 38 Xueyuan Road, Beijing 100191, China. Email address: yemin@bjmu.edu.cn (M. Ye). Tel.: +86 10 82801516. Fax: +86 10 82802024.

## **Table of content**

**Fig. 1S.** Metabolic pathway of **C2** in rats.

**Table 1S.** Metabolites identified from single *Pueraria* compounds.

**Table 2S.** Metabolites identified from single *Scutellaria* compounds.

**Table 3S.** Metabolites identified from single *Coptidis* alkaloids.

**Table 4S.** Metabolites of *Scutellariae Radix* extract.

**Table 5S.** Instrument parameters for neutral loss scan and precursor ion scan.

**Table 6S.** Metabolites of *Puerariae Lobatae Radix* extract.

**Table 7S.** Metabolites of *Coptidis Rhizoma* extract.

**Table 8S.** Instrument parameters for SRM scans.

**Table 9S.** Source herb and *in vivo* distribution of GQD metabolites.

**Fig. 1S.**

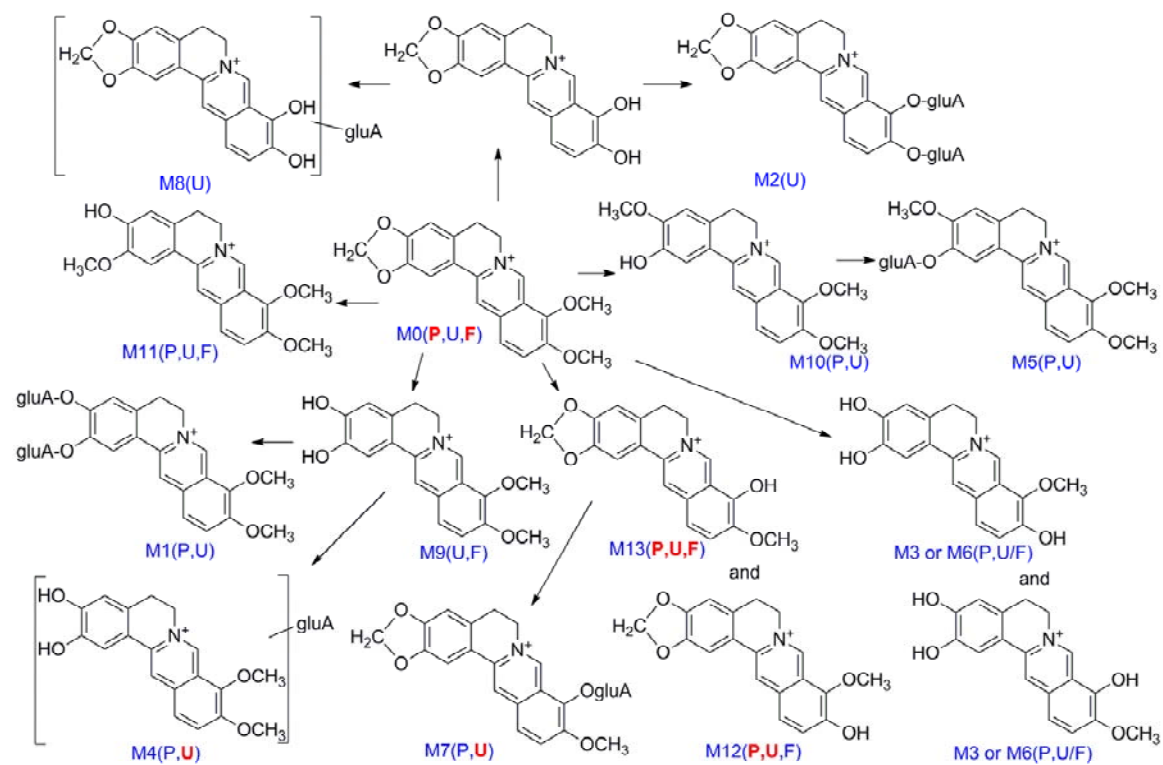

**Table 1S.** Metabolites identified from single *Pueraria* compounds.

| No.  | $t_R$<br>(min) | Identification                                           | $m/z$ | UV      | (-)-ESI-MS <sup>n</sup>                   | Formula                                           | Source compd. and distribution in biosamples |              |             |
|------|----------------|----------------------------------------------------------|-------|---------|-------------------------------------------|---------------------------------------------------|----------------------------------------------|--------------|-------------|
|      |                |                                                          |       |         |                                           |                                                   | Plasma                                       | Urine        | Feces       |
| PS1  | 9.0            | $\Delta^*3'$ -hydroxypuerarin- <i>O</i> -gluA            | 607   | ND      | ND                                        | C <sub>27</sub> H <sub>28</sub> O <sub>16</sub>   | P10                                          | P2,P10       | -           |
| PS2  | 9.3            | *3'-hydroxypuerarin                                      | 431   | ND      | MS2:311; MS3:255,283                      | C <sub>21</sub> H <sub>20</sub> O <sub>10</sub>   | P2                                           | P2,P10       | P2,P10      |
| PS3  | 9.3            | $\Delta^*$ puerarin- <i>O</i> -gluA                      | 591   | 252,300 | MS2:175, <b>415</b> ; MS3:267,295,325     | C <sub>27</sub> H <sub>28</sub> O <sub>15</sub>   | P9                                           | P9           | -           |
| PS4  | 9.5            | $\Delta^*3'$ -methoxypuerarin- <i>O</i> -gluA            | 621   | 242,308 | MS2:445; MS3:297,325,355                  | C <sub>28</sub> H <sub>30</sub> O <sub>16</sub>   | P2,P10                                       | P2,P10       | -           |
| PS5  | 9.6            | $\Delta^*3'$ -methoxypuerarin- <i>O</i> -Sul             | 525   | 244,308 | MS2:445; MS3:430,325,355                  | C <sub>22</sub> H <sub>22</sub> O <sub>13</sub> S | P2                                           | P2,P10       | -           |
| PS6  | 9.6            | $\Delta^*$ puerarin- <i>O</i> -Sul                       | 495   | 244,306 | MS2: <b>325</b> ,375,405,415; MS3:267,307 | C <sub>21</sub> H <sub>20</sub> O <sub>12</sub> S | P9                                           | P9           | -           |
| PS7  | 9.7            | $\Delta^*3'$ -hydroxypuerarin- <i>O</i> -Sul             | 511   | ND      | MS2:341,391,431                           | C <sub>21</sub> H <sub>20</sub> O <sub>13</sub> S | P10                                          | P10          | -           |
| PS8  | 9.8            | $\Delta^*$ daidzein- <i>O</i> -Sul- <i>O</i> -gluA       | 509   | 256,306 | MS2:253, <b>333</b> ; MS3:253             | C <sub>21</sub> H <sub>18</sub> O <sub>13</sub> S | P1,P3,P9                                     | -            | -           |
| PS9  | 10.3           | *mirificin                                               | 547   | 268,365 | MS2:267, <b>295</b> ,325; MS3:267         | C <sub>26</sub> H <sub>28</sub> O <sub>13</sub>   | P6                                           | P6           | P6          |
| PS10 | 10.5           | *puerarin                                                | 415   | 250,306 | MS2:267, <b>295</b> ; MS3:267             | C <sub>21</sub> H <sub>20</sub> O <sub>9</sub>    | P9                                           | P9           | P9          |
| PS11 | 10.6           | *3'-methoxypuerarin                                      | 445   | 250,294 | MS2:297, <b>325</b> ; MS3:297,310         | C <sub>22</sub> H <sub>22</sub> O <sub>10</sub>   | P2,P10                                       | P2,P10       | P2,P10      |
| PS12 | 11.7           | $\Delta^*$ daidzein- <i>O</i> -gluA                      | 429   | 258     | MS2:175, <b>253</b> ; MS3:209,225         | C <sub>21</sub> H <sub>18</sub> O <sub>10</sub>   | P1,P3,P9                                     | P1,P3,P9     | P9          |
| PS13 | 11.9           | $\Delta^*$ equol- <i>O</i> -Sul- <i>O</i> -gluA          | 497   | ND      | ND                                        | C <sub>21</sub> H <sub>22</sub> O <sub>12</sub> S | P1,P3,P9                                     | -            | -           |
| PS14 | 12.6           | $\Delta^*4'$ -methoxypuerarin-7- <i>O</i> -gluA          | 605   | ND      | MS2:309,339, <b>429</b> ; MS3:281,309     | C <sub>28</sub> H <sub>30</sub> O <sub>15</sub>   | P6                                           | P6           | -           |
| PS15 | 13.5           | *formononetin 8-C-glu(6-1)-api                           | 561   | 250,308 | MS2: <b>309</b> ,339; MS3:281             | C <sub>27</sub> H <sub>30</sub> O <sub>13</sub>   | P6                                           | P6           | P6          |
| PS16 | 14.3           | *4'-methoxypuerarin                                      | 429   | 230,324 | MS2:281, <b>309</b> ,339; MS3:281         | C <sub>22</sub> H <sub>22</sub> O <sub>9</sub>    | P6                                           | P6           | P6          |
| PS17 | 15.0           | $\Delta^*$ equol- <i>O</i> -gluA                         | 417   | 224,280 | MS2:175,241                               | C <sub>21</sub> H <sub>22</sub> O <sub>9</sub>    | P1,P3,P9                                     | P1,P3,P9     | -           |
| PS18 | 16.0           | $\Delta^*$ daidzein- <i>O</i> -Sul                       | 333   | 250,304 | MS2:225, <b>253</b> ; MS3:197,225         | C <sub>15</sub> H <sub>10</sub> O <sub>7</sub> S  | P1,P3,P9                                     | P1,P3,P9     | P1,P3       |
| PS19 | 16.8           | 3'-hydroxydaidzein                                       | 269   | ND      | MS2:225,241                               | C <sub>15</sub> H <sub>10</sub> O <sub>5</sub>    | -                                            | P2,P10       | P2          |
| PS20 | 18.4           | $\Delta^*$ <i>O</i> -desmethylangolensin- <i>O</i> -gluA | 433   | 272,320 | MS2:175, <b>257</b> ; MS3:109,147,163,239 | C <sub>21</sub> H <sub>22</sub> O <sub>10</sub>   | P1,P3                                        | P1,P3        | -           |
| PS21 | 18.8           | *3'-methoxydaidzein                                      | 283   | 248,286 | MS2:268                                   | C <sub>16</sub> H <sub>12</sub> O <sub>5</sub>    | -                                            | P1,P2,P3,P10 | P1,P2,P3    |
| PS22 | 18.9           | *daidzein                                                | 283   | 250,288 | MS2:268; MS3:135,161,195,211,224,240      | C <sub>15</sub> H <sub>10</sub> O <sub>4</sub>    | P9                                           | P1,P3,P6,P9  | P1,P3,P6,P9 |
| PS23 | 18.9           | $\Delta^*$ equol- <i>O</i> -Sul                          | 321   | 220,282 | MS2:241; MS3:109,121                      | C <sub>15</sub> H <sub>14</sub> O <sub>6</sub> S  | P1,P3,P9                                     | P1,P3,P9     | P1,P3       |
| PS24 | 19.3           | $\Delta^*$ <i>O</i> -desmethylangolensin- <i>O</i> -Sul  | 337   | 224,284 | MS2:257; MS3:135                          | C <sub>15</sub> H <sub>14</sub> O <sub>7</sub> S  | -                                            | P1,P3        | -           |
| PS25 | 19.6           | $\Delta^*$ equol- <i>O</i> -Sul                          | 321   | 220,282 | MS2:241                                   | C <sub>15</sub> H <sub>14</sub> O <sub>6</sub> S  | -                                            | P1,P3        | P1,P3       |
| PS26 | 20.6           | *equol                                                   | 241   | ND      | ND                                        | C <sub>15</sub> H <sub>14</sub> O <sub>3</sub>    | -                                            | P1,P3,P9     | P1,P3,P9    |
| PS27 | 21.0           | * <i>O</i> -desmethylangolensin                          | 257   | 278,314 | MS2:109,147                               | C <sub>15</sub> H <sub>14</sub> O <sub>4</sub>    | -                                            | P1,P3        | P1,P3       |
| PS28 | 21.5           | *formononetin                                            | 267   | 250,300 | MS2:252                                   | C <sub>16</sub> H <sub>12</sub> O <sub>4</sub>    | -                                            | P1,P3, P6    | P1,P3, P6   |

**Table 2S.** Metabolites identified from single *Scutellaria* compounds.

| No.  | <i>t<sub>R</sub></i><br>(min) | Identification                 | <i>m/z</i> | UV          | (-)-ESI-MS <sup>n</sup>          | Formula                                           | Source compd. and distribution in biosamples |             |         |
|------|-------------------------------|--------------------------------|------------|-------------|----------------------------------|---------------------------------------------------|----------------------------------------------|-------------|---------|
|      |                               |                                |            |             |                                  |                                                   | Plasma                                       | Urine       | Feces   |
| SS1  | 8.3                           | Δ*pentahydroxyflavanone-O-gluA | 479        | 226,286,326 | MS2:175,275,303,451; MS3:125,177 | C <sub>21</sub> H <sub>20</sub> O <sub>13</sub>   | S1                                           | S1          | -       |
| SS2  | 9.0                           | Δ*pentahydroxyflavanone-O-gluA | 479        | 224,284     | MS2:303,451; MS3:125             | C <sub>21</sub> H <sub>20</sub> O <sub>13</sub>   | S1                                           | S1          | -       |
| SS3  | 9.6                           | Δ*pentahydroxyflavonol-O-gluA  | 477        | 220,250,290 | MS2:301                          | C <sub>21</sub> H <sub>18</sub> O <sub>13</sub>   | S1                                           | S1          | -       |
| SS4  | 10.0                          | Δ*pentahydroxyflavanone-O-gluA | 479        | 226,288     | MS2:285,303,353; MS3:125,177     | C <sub>21</sub> H <sub>20</sub> O <sub>13</sub>   | S1                                           | S1          | -       |
| SS5  | 10.7                          | Δ*pentahydroxyflavanone-O-Sul  | 383        | 224,284,344 | MS2:303; MS3:125,177,217,285     | C <sub>15</sub> H <sub>12</sub> O <sub>10</sub> S | -                                            | S1          | -       |
| SS6  | 11.0                          | Δ*pentahydroxyflavanone-O-Sul  | 383        | 222,278,334 | MS2:303; MS3:177                 | C <sub>15</sub> H <sub>12</sub> O <sub>10</sub> S | -                                            | S1          | -       |
| SS7  | 12.2                          | *chrysin 6-C-ara-8-C-glc       | 547        | 272,324     | MS2:337,367,427,457,487,529;     | C <sub>26</sub> H <sub>28</sub> O <sub>13</sub>   | S4                                           | S4          | S4      |
| SS8  | 12.6                          | *pentahydroxyflavanone         | 303        | 226,290     | MS2:125,177,259,285              | C <sub>15</sub> H <sub>12</sub> O <sub>7</sub>    | S1                                           | S1          | S1      |
| SS9  | 12.6                          | Δ*pentahydroxyflavonol-O-Sul   | 381        | ND          | MS2:301; MS3:125,147,191         | C <sub>15</sub> H <sub>10</sub> O <sub>10</sub> S | -                                            | S1          | -       |
| SS10 | 14.3                          | Δ*baicalein-7-O-glc-O-gluA     | 607        | ND          | MS2:431                          | C <sub>27</sub> H <sub>28</sub> O <sub>16</sub>   | S10,S16                                      | S10,S16     | -       |
| SS11 | 14.5                          | Δ*baicalein-di-O-gluA          | 621        | 272,310     | MS2:269,445; MS3:175,269         | C <sub>27</sub> H <sub>26</sub> O <sub>17</sub>   | S10,S16                                      | S10,S16     | -       |
| SS12 | 14.7                          | *pentahydroxyflavonol          | 301        | 254,302,344 | MS2:125,151,193,229,257          | C <sub>15</sub> H <sub>10</sub> O <sub>7</sub>    | -                                            | S1          | S1      |
| SS13 | 15.3                          | Δ*wogonin-di-O-gluA            | 635        | ND          | MS2:459; MS3:283                 | C <sub>28</sub> H <sub>28</sub> O <sub>17</sub>   | S2,S15                                       | S2          | -       |
| SS14 | 15.4                          | Δ*chrysin 6-C-ara-O-gluA       | 561        | 272,302     | MS2:385; MS3:267,295,325         | C <sub>26</sub> H <sub>26</sub> O <sub>14</sub>   | S4                                           | -           | -       |
| SS15 | 16.0                          | *chrysin 6-C-ara               | 385        | 274,316     | MS2:295,325; MS3:267             | C <sub>20</sub> H <sub>18</sub> O <sub>8</sub>    | S4                                           | -           | S4      |
| SS16 | 17.5                          | Δ*baicalin                     | 445        | 272,310     | MS2:269; MS3:251                 | C <sub>21</sub> H <sub>18</sub> O <sub>11</sub>   | S10,S14,S16                                  | S14,S10,S16 | S10,S16 |
| SS17 | 18.6                          | Δ*wogonin-5-O-gluA             | 459        | 222,266     | MS2:175,268,283; MS3:137,239,268 | C <sub>22</sub> H <sub>20</sub> O <sub>11</sub>   | S2,S15                                       | S2,S15      | -       |
| SS18 | 18.6                          | Δ norwogonin-O-gluA            | 445        | 224,274     | MS2:175,269                      | C <sub>21</sub> H <sub>18</sub> O <sub>11</sub>   | S15                                          | S2,S15      | -       |
| SS19 | 18.7                          | Δ* oroxylin A-7-O-gluA         | 459        | 262,324     | MS2:175,283; MS3:268             | C <sub>22</sub> H <sub>20</sub> O <sub>11</sub>   | S10,S14,S16                                  | S14,S10,S16 | -       |
| SS20 | 18.9                          | Δ norwogonin-O-gluA            | 445        | 276         | MS2:175,269; MS3:197,226,241     | C <sub>21</sub> H <sub>18</sub> O <sub>11</sub>   | S2,S15                                       | S2,S15      | -       |
| SS21 | 19.0                          | baicalein-O-glc                | 431        | ND          | MS2:197,269                      | C <sub>21</sub> H <sub>20</sub> O <sub>10</sub>   | S16                                          | S10,S16     | -       |
| SS22 | 19.0                          | Δ*baicalein-O-gluA             | 445        | 270,316     | MS2:175,269                      | C <sub>21</sub> H <sub>18</sub> O <sub>11</sub>   | S10,S14,S16                                  | S10,S16     | -       |
| SS23 | 19.3                          | norwogonin-O-gluA              | 445        | ND          | ND                               | C <sub>21</sub> H <sub>18</sub> O <sub>11</sub>   | S2,S15                                       | -           | -       |
| SS24 | 19.5                          | Δ*wogonoside                   | 459        | 224,274,344 | MS2:175,283; MS3:137,268         | C <sub>22</sub> H <sub>20</sub> O <sub>11</sub>   | S2,S15                                       | S2,S15      | S15     |
| SS25 | 21.3                          | *baicalein                     | 269        | 278,324     | MS2:225,251                      | C <sub>15</sub> H <sub>10</sub> O <sub>5</sub>    | S10,S16                                      | S10,S16     | S10,S16 |
| SS26 | 23.5                          | *wogonin                       | 283        | 276         | MS2:109,137,197,268              | C <sub>16</sub> H <sub>12</sub> O <sub>5</sub>    | S2,S15                                       | S2,S15      | S2,S15  |

---

SS27 23.8 \*oroxilin A 283 270,320 MS2:137,191,268 C<sub>16</sub>H<sub>12</sub>O<sub>5</sub> S10 S14,S10,S16 S14

**Table 3S.** Metabolites identified from single *Coptidis* alkaloids.

| No.  | <i>t<sub>R</sub></i> (min) | Identification                                   | <i>m/z</i> | UV          | (-)-ESI-MS <sup>n</sup>                  | Formula                                          | Source compd. and distribution in biosamples |       |       |
|------|----------------------------|--------------------------------------------------|------------|-------------|------------------------------------------|--------------------------------------------------|----------------------------------------------|-------|-------|
|      |                            |                                                  |            |             |                                          |                                                  | Plasma                                       | Urine | Feces |
| CS1  | 9.8                        | demethyleneberberine-di- <i>O</i> -gluA          | 676        | 272,334     | MS2:324, <b>500</b> ; MS3:324,309        | C <sub>31</sub> H <sub>33</sub> NO <sub>16</sub> | C2                                           | C2    | -     |
| CS2  | 10.4                       | didemethylberberine-di- <i>O</i> -gluA           | 660        | 272,344     | MS2:308, <b>484</b> ; MS3:308            | C <sub>30</sub> H <sub>29</sub> NO <sub>16</sub> | -                                            | C2    | -     |
| CS3  | 11.3                       | tridemethylated palmatine                        | 310        | ND          | MS2:295                                  | C <sub>18</sub> H <sub>15</sub> NO <sub>4</sub>  | C2,C1                                        | C1    | C2    |
| CS4  | 11.5                       | Δdemethyleneberberine- <i>O</i> -gluA            | 500        | 278,344     | MS2: <b>324</b> ; MS3:280,309            | C <sub>25</sub> H <sub>25</sub> NO <sub>10</sub> | C2,C1                                        | C2,C1 | -     |
| CS5  | 11.6                       | Δ3-methoxydemethyleneberberine-2- <i>O</i> -gluA | 514        | ND          | MS2: <b>338</b> ; MS3:294,323            | C <sub>26</sub> H <sub>27</sub> NO <sub>10</sub> | C2,C1                                        | C2,C1 | -     |
| CS6  | 11.7                       | tridemethylated palmatine                        | 310        | ND          | MS2:295                                  | C <sub>18</sub> H <sub>15</sub> NO <sub>4</sub>  | C2                                           | C1    | C2    |
| CS7  | 11.9                       | Δmonohydroxypalmatine- <i>O</i> -gluA            | 514        | ND          | ND                                       | C <sub>26</sub> H <sub>27</sub> NO <sub>10</sub> | C1                                           | C1    | -     |
| CS8  | 12.2                       | Δberberrubine-9- <i>O</i> -gluA                  | 498        | 236,262,346 | MS2: <b>322</b> ; MS3:307                | C <sub>25</sub> H <sub>23</sub> NO <sub>10</sub> | C2                                           | C2    | -     |
| CS9  | 12.6                       | Δdidemethylberberine- <i>O</i> -gluA             | 484        | ND          | MS2: <b>308</b> ;<br>MS3:251,261,280,295 | C <sub>24</sub> H <sub>21</sub> NO <sub>10</sub> | -                                            | C2    | -     |
| CS10 | 13.3                       | demethyleneberberine                             | 324        | ND          | MS2:280, <b>309</b> ; MS3:280            | C <sub>19</sub> H <sub>17</sub> NO <sub>4</sub>  | C1                                           | C2,C1 | C2    |
| CS11 | 15.6                       | 3-methoxydemethyleneberberine                    | 338        | 230,345     | MS2: <b>323</b> ; MS3:294,322,307        | C <sub>20</sub> H <sub>19</sub> NO <sub>4</sub>  | C2,C1                                        | C2,C1 | C2    |
| CS12 | 16.2                       | *jatrorrhizine                                   | 338        | 264,342     | MS2:294, <b>323</b> ; MS3:294,322        | C <sub>20</sub> H <sub>19</sub> NO <sub>4</sub>  | C2                                           | C2    | -     |
| CS13 | 16.5                       | thalifendine                                     | 322        | ND          | MS2: <b>307</b> ; MS3:279,292            | C <sub>19</sub> H <sub>15</sub> NO <sub>4</sub>  | C2                                           | C2    | C2    |
| CS14 | 16.8                       | monohydroxypalmatine                             | 338        | ND          | ND                                       | C <sub>20</sub> H <sub>19</sub> NO <sub>4</sub>  | C1                                           | C1    | C1    |
| CS15 | 17.5                       | berberrubine                                     | 322        | 275,330     | MS2: <b>307</b> ; MS3:279                | C <sub>19</sub> H <sub>15</sub> NO <sub>4</sub>  | C2                                           | C2    | C2    |
| CS16 | 18                         | *palmatine                                       | 352        | 270,350     | MS2: <b>337</b> ; MS3:308,336            | C <sub>21</sub> H <sub>21</sub> NO <sub>4</sub>  | C1                                           | C1    | C1    |
| CS17 | 18.3                       | *berberine                                       | 336        | 234,264,346 | MS2:292, <b>321</b> ;<br>MS3:292,318,320 | C <sub>20</sub> H <sub>17</sub> NO <sub>4</sub>  | C2                                           | C2    | C2    |

**Table 4S.** Metabolites of Puerariae Lobatae Radix extract.

| No.  | $t_R$<br>(min) | $m/z$ | NL         | PR      | SRM                    | UV (nm) | Formula                                           | HRMS, [M-H] <sup>-</sup> |           |                | Identification                         | P     | U     | F  |
|------|----------------|-------|------------|---------|------------------------|---------|---------------------------------------------------|--------------------------|-----------|----------------|----------------------------------------|-------|-------|----|
|      |                |       |            |         |                        |         |                                                   | Measured                 | Predicted | $\Delta$ (ppm) |                                        |       |       |    |
| PE1  | 11.7           | 591   | 176        | 415     | <b>591/415</b>         | 242     | C <sub>27</sub> H <sub>28</sub> O <sub>15</sub>   | 591.1356                 | 591.1355  | -0.09          | $\Delta^*$ puerarin-O-gluA             | DH,DL | DH,DL | /  |
| PE2  | 11.9           | 607   | 176        | 431     | <b>607/431</b>         | nd      | C <sub>27</sub> H <sub>28</sub> O <sub>16</sub>   | 607.1301                 | 607.1305  | 0.59           | $\Delta^*$ 3'-hydroxypuerarin-O-gluA   | DH,DL | DH,DL | /  |
| PE3  | 12.5           | 431   | 120        | 311     | <b>431/311</b>         | 222,278 | C <sub>21</sub> H <sub>20</sub> O <sub>10</sub>   | 431.0988                 | 431.0984  | -0.99          | *3'-hydroxypuerarin                    | /     | DH,DL | DH |
| PE4  | 12.8           | 621   | 176        | 445     | <b>621/445</b>         | 250     | C <sub>28</sub> H <sub>30</sub> O <sub>16</sub>   | 621.1460                 | 621.1461  | 0.17           | $\Delta^*$ 3'-methoxypuerarin-O-gluA   | DH    | DH,DL | /  |
| PE5  | 13.8           | 495   | 80         | 415     | <b>495/415</b>         | 224,300 | C <sub>21</sub> H <sub>20</sub> O <sub>12</sub> S | 495.0602                 | 495.0603  | 0.14           | $\Delta^*$ puerarin-O-Sul              | DH,DL | DH,DL | /  |
| PE6  | 14.0           | 525   | 80         | 445,325 | <b>525/325,525/445</b> | 224,308 | C <sub>22</sub> H <sub>22</sub> O <sub>13</sub> S | 525.0692                 | 525.0708  | 3.11           | $\Delta^*$ 3'-methoxypuerarin-O-Sul    | DH    | DH,DL | /  |
| PE7  | 14.1           | 511   | 80         | 431     | <b>511/431</b>         | nd      | C <sub>21</sub> H <sub>20</sub> O <sub>13</sub> S | 511.0449                 | 511.0552  | 0.56           | $\Delta^*$ 3'-hydroxypuerarin-O-Sul    | DH,DL | DH,DL | /  |
| PE8  | 15.6           | 415   | 120        | 295     | <b>415/295</b>         | 256,304 | C <sub>21</sub> H <sub>20</sub> O <sub>9</sub>    | 415.1033                 | 415.1035  | 0.37           | *puerarin                              | DH,DL | DH,DL | DH |
| PE9  | 16.6           | 509   | 176,80(nd) | 253,333 | <b>509/429,509/333</b> | 256,306 | C <sub>21</sub> H <sub>18</sub> O <sub>13</sub> S | 547.1459                 | 509.0395  | -0.34          | $\Delta^*$ daidzein-O-Sul-O-gluA       | DH,DL | DH,DL | /  |
| PE10 | 16.9           | 547   | 252        | 295     | <b>547/295</b>         | 250,294 | C <sub>26</sub> H <sub>28</sub> O <sub>13</sub>   | 445.1141                 | 547.1457  | -0.18          | *mirificin                             | DH,DL | DH,DL | DH |
| PE11 | 17.0           | 445   | 120        | 325,430 | <b>445/325,445/430</b> | 250,294 | C <sub>22</sub> H <sub>22</sub> O <sub>10</sub>   | 509.0393                 | 445.1140  | 0.46           | *3'-methoxypuerarin                    | DH,DL | DH,DL | DH |
| PE12 | 17.1           | 525   | 80         | 445,325 | <b>525/325,525/445</b> | nd      | C <sub>22</sub> H <sub>22</sub> O <sub>13</sub> S | 525.0705                 | 525.0708  | 0.64           | methoxypuerarin-O-Sul                  | DH    | DH    | /  |
| PE13 | 17.7           | 577   | 252        | 325     | <b>577/325</b>         | 246,344 | C <sub>27</sub> H <sub>30</sub> O <sub>14</sub>   | 577.1562                 | 577.1563  | 0.14           | *3'-methoxymirificin                   | DH,DL | DH,DL | DH |
| PE14 | 19.5           | 445   | 120        | 325,430 | <b>445/325,445/430</b> | nd      | C <sub>22</sub> H <sub>22</sub> O <sub>10</sub>   | 445.1142                 | 445.1140  | -0.4           | methoxypuerarin                        | DH,DL | DH,DL | /  |
| PE15 | 20.6           | 429   | 176        | 253     | <b>429/253</b>         | 260,298 | C <sub>21</sub> H <sub>18</sub> O <sub>10</sub>   | 429.0830                 | 429.0827  | -0.65          | $\Delta^*$ daidzein-O-gluA             | DH,DL | DH,DL | /  |
| PE16 | 25.8           | 473   | 176        | 297     | <b>473/297</b>         | nd      | C <sub>23</sub> H <sub>22</sub> O <sub>11</sub>   | 473.1094                 | 473.1089  | -0.98          | $\Delta$ puerol A-O-gluA               | DH    | DH    | /  |
| PE17 | 28.5           | 605   | 176        | 429,309 | <b>605/429,605/309</b> | nd      | C <sub>28</sub> H <sub>30</sub> O <sub>15</sub>   | 605.1539                 | 605.1512  | -4.46          | $\Delta^*$ 4'-methoxypuerarin-7-O-gulA | DH,DL | DH    | /  |
| PE18 | 30.8           | 497   | 80,176     | 321,417 | <b>497/241,497/417</b> | nd      | C <sub>21</sub> H <sub>22</sub> O <sub>12</sub> S | 497.0765                 | 497.0759  | -1.16          | $\Delta^*$ equol-O-Sul-O-gluA          | DH,DL | /     | /  |
| PE19 | 31.9           | 497   | 80,176     | 321     | <b>497/241,497/417</b> |         | C <sub>21</sub> H <sub>22</sub> O <sub>12</sub> S |                          | 497.0759  |                | $\Delta^*$ equol-O-Sul-O-gluA          | DH,DL | /     | /  |
| PE20 | 32.0           | 473   | 176        | 297     | <b>473/297</b>         | nd      | C <sub>23</sub> H <sub>22</sub> O <sub>11</sub>   | 473.1083                 | 473.1089  | 1.34           | $\Delta$ puerol A-O-gluA               | DH,DL | DH,DL | /  |
| PE21 | 32.0           | 445   | 176        | 269     | <b>445/269</b>         | nd      | C <sub>21</sub> H <sub>18</sub> O <sub>11</sub>   | 445.0771                 | 445.0776  | 1.2            | $\Delta$ 3'-hydroxydaidzein-O-gluA     | DH,DL | DH,DL | /  |
| PE22 | 35.3           | 429   |            |         | <b>429/309</b>         | nd      | C <sub>22</sub> H <sub>22</sub> O <sub>9</sub>    | 429.1193                 | 429.1191  | -0.45          | *4'-methoxypuerarin                    | DH,DL | DH,DL | DH |
| PE23 | 35.8           | 561   | 252        | 309     | <b>561/309,561/339</b> | nd      | C <sub>27</sub> H <sub>30</sub> O <sub>13</sub>   | 561.1632                 | 561.1614  | -3.26          | *formononetin 8-C-glu(6-1)-api         | DH,DL | DH,DL | DH |
| PE24 | 36.8           | 497   | 80         | 321     | <b>497/241,497/417</b> |         | C <sub>21</sub> H <sub>22</sub> O <sub>12</sub> S |                          | 497.0759  |                | $\Delta^*$ equol-O-Sul-O-gluA          | DH,DL | /     | /  |
| PE25 | 40.2           | 459   | 176        | 283     | <b>459/283</b>         | nd      | C <sub>22</sub> H <sub>20</sub> O <sub>11</sub>   | 459.0934                 | 459.0933  | -0.25          | $\Delta^*$ 3'-methoxydaidzein-O-gluA   | DH,DL | DH,DL | /  |
| PE26 | 40.7           | 269   | 28         | 241     | <b>269/241</b>         | nd      | C <sub>15</sub> H <sub>10</sub> O <sub>5</sub>    | 269.0453                 | 269.0455  | 0.91           | 3'-hydroxydaidzein                     | /     | DH    | /  |



|      |      |     |     |         |                        |         |                                                  |          |          |       |                                |       |       |    |
|------|------|-----|-----|---------|------------------------|---------|--------------------------------------------------|----------|----------|-------|--------------------------------|-------|-------|----|
| PE27 | 41.1 | 417 | 176 | 241     | <b>417/241</b>         | nd      | C <sub>21</sub> H <sub>22</sub> O <sub>9</sub>   | 417.1193 | 417.1191 | -0.46 | Δ*equol-O-gluA                 | DH,DL | DH,DL | /  |
| PE28 | 43.6 | 377 | 80  | 297     | <b>377/297</b>         | nd      | C <sub>17</sub> H <sub>14</sub> O <sub>8</sub> S | 377.0352 | 377.0337 | -4.07 | Δpuerol A-O- Sul               | /     | DH,DL | /  |
| PE29 | 44.5 | 333 | 80  | 253,225 | <b>333/253,333/225</b> | 250,304 | C <sub>15</sub> H <sub>10</sub> O <sub>7</sub> S | 333.0078 | 333.0074 | -1.06 | Δ*daidzein-O-Sul               | DH,DL | DH,DL | /  |
| PE30 | 45.3 | 363 | 80  | 283     | <b>363/283</b>         | 220,278 | C <sub>16</sub> H <sub>12</sub> O <sub>8</sub> S | 363.0181 | 363.0180 | -0.24 | Δ*3'-methoxydaidzein-O-Sul     | DH,DL | DH,DL | /  |
| PE31 | 45.8 | 363 | 80  | 283     | <b>363/283</b>         | 288,324 | C <sub>16</sub> H <sub>12</sub> O <sub>8</sub> S | 363.0177 | 363.0180 | 0.86  | Δ*3'-methoxydaidzein-O-Sul     | DH,DL | DH,DL | /  |
| PE32 | 50.4 | 297 |     |         | <b>297/253</b>         | 225,324 | C <sub>17</sub> H <sub>14</sub> O <sub>5</sub>   | 297.0767 | 297.0768 | 0.49  | puerol A                       | DH,DL | DH,DL | /  |
| PE33 | 53.2 | 443 | 176 | 267     | <b>443/267</b>         | nd      | C <sub>22</sub> H <sub>20</sub> O <sub>10</sub>  | 443.0984 | 443.0984 | -0.07 | *formononetin-7-O-gluA         | DH,DL | DH,DL | /  |
| PE34 | 53.4 | 487 | 176 | 311     | <b>487/311</b>         | nd      | C <sub>24</sub> H <sub>24</sub> O <sub>11</sub>  | 487.1250 | 487.1246 | -0.85 | Δpuerol B-O-gluA               | DH,DL | DH,DL | /  |
| PE35 | 55.9 | 255 |     | 119,149 | <b>255/119,255/149</b> | 278,314 | C <sub>15</sub> H <sub>12</sub> O <sub>4</sub>   | 255.0662 | 255.0663 | 0.32  | *dihydrodaidzein               | DH    | DH    | /  |
| PE36 | 56.0 | 487 | 176 | 311     | <b>487/311</b>         | nd      | C <sub>24</sub> H <sub>24</sub> O <sub>11</sub>  | 487.1250 | 487.1246 | -0.85 | Δpuerol B-O-gluA               | DH,DL | DH,DL | DH |
| PE37 | 56.3 | 253 | 28  | 225     | <b>253/225</b>         | 260,304 | C <sub>15</sub> H <sub>10</sub> O <sub>4</sub>   | 253.0507 | 253.0506 | -0.27 | *daidzein                      | DH,DL | DH,DL | DH |
| PE38 | 57.0 | 433 | 176 | 257     | <b>433/257</b>         | nd      | C <sub>21</sub> H <sub>22</sub> O <sub>10</sub>  | 433.1143 | 433.1140 | -0.64 | Δ*O-desmethylangolensin-O-gluA | DH,DL | DH,DL | /  |
| PE39 | 57.1 | 283 | 15  | 268     | <b>283/268</b>         | 248,286 | C <sub>16</sub> H <sub>12</sub> O <sub>5</sub>   | 283.0611 | 283.0612 | 0.34  | *3'-methoxydaidzein            | DH,DL | DH,DL | /  |
| PE40 | 58.5 | 337 | 80  | 257     | <b>337/257</b>         | 226,308 | C <sub>15</sub> H <sub>14</sub> O <sub>7</sub> S | 337.0931 | 337.0387 | -1.04 | Δ*O-desmethylangolensin-O-Sul  | DH,DL | DH,DL | /  |
| PE41 | 58.7 | 321 | 80  | 241     | <b>321/241</b>         | nd      | C <sub>15</sub> H <sub>14</sub> O <sub>6</sub> S | 321.0439 | 321.0438 | 0.1   | Δ*equol-O-Sul                  | DH,DL | DH,DL | /  |
| PE42 | 60.3 | 321 | 80  | 241     | <b>321/241</b>         | 220,282 | C <sub>15</sub> H <sub>14</sub> O <sub>6</sub> S | 321.0440 | 321.0438 | -0.52 | Δ*equol-O-Sul                  | DH,DL | DH,DL | /  |
| PE43 | 62.0 | 391 | 80  | 311     | <b>391/311</b>         | 224,300 | C <sub>18</sub> H <sub>16</sub> O <sub>8</sub> S | 391.0492 | 391.0493 | 0.29  | Δpuerol B-O- Sul               | DH,DL | DH,DL | /  |
| PE44 | 62.6 | 241 |     | 119     | <b>241/119</b>         |         | C <sub>15</sub> H <sub>14</sub> O <sub>3</sub>   | 241.0873 | 241.0870 | -1.17 | *equol                         | /     | DH    | /  |
| PE45 | 63.3 | 311 |     | 119     | <b>311/119,311/267</b> | 224,324 | C <sub>18</sub> H <sub>16</sub> O <sub>5</sub>   | 311.0926 | 311.0925 | -0.33 | puerol B                       | DH    | DH,DL | DH |
| PE46 | 65.4 | 257 |     | 135     | <b>257/135,257/109</b> | 278,314 | C <sub>15</sub> H <sub>14</sub> O <sub>4</sub>   | 257.0819 | 257.0819 | 0.13  | *O-desmethylangolensin         | /     | DH,DL | DH |
| PE47 | 66.2 | 267 | 15  |         | <b>267/252</b>         | 250,300 | C <sub>16</sub> H <sub>12</sub> O <sub>4</sub>   | 267.0662 | 267.0663 | 0.31  | *formononetin                  | DH    | DH,DL | DH |

**Table 5S.** Instrument parameters for neutral loss scan and precursor ion scan.

| Ion mode                     | Negative | Positive |
|------------------------------|----------|----------|
| Spray voltage                | 3800     | 4000     |
| Sheath gas pressure          | 50       | 45       |
| Aux gas pressure             | 5        | 5        |
| Capillary temperature        | 330      | 330      |
| Capillary offset             | -35      | 35       |
| Source fragmentation voltage | 5-10     | 0        |
| Collion energy               | 25-30    | 25-30    |

**Table 6S.** Metabolites of *Scutellariae Radix* extract.

| No.  | $t_R$<br>(min) | $m/z$ | NL      | PR            | SRM                     | UV (nm)  | Formula                                           | HRMS, [M-H] <sup>-</sup> |           |                | Identification                                             | P     | U     | F  |
|------|----------------|-------|---------|---------------|-------------------------|----------|---------------------------------------------------|--------------------------|-----------|----------------|------------------------------------------------------------|-------|-------|----|
|      |                |       |         |               |                         |          |                                                   | Measured                 | Predicted | $\Delta$ (ppm) |                                                            |       |       |    |
| SE1  | 8.5            | 479   | 176     | 303, 125      | 479/303, <b>479/125</b> | 286, 326 | C <sub>21</sub> H <sub>20</sub> O <sub>13</sub>   | 479.0842                 | 479.0831  | -2.26          | $\Delta^*$ pentahydroxyflavanone- <i>O</i> -gluA           | DH,DL | DH,DL | /  |
| SE2  | 9.4            | 479   | 176     | 303, 125      | 479/303, <b>479/125</b> | 224, 284 | C <sub>21</sub> H <sub>20</sub> O <sub>13</sub>   | 479.0847                 | 479.0831  | -3.3           | $\Delta^*$ pentahydroxyflavanone- <i>O</i> -gluA           | DH,DL | DH,DL | /  |
| SE3  | 11.5           | 477   | 176     | 301, 151      | <b>477/301</b> ,477/125 | 250, 290 | C <sub>21</sub> H <sub>18</sub> O <sub>13</sub>   | 477.0686                 | 477.0675  | -2.38          | $\Delta^*$ pentahydroxyflavonol- <i>O</i> -gluA            | /     | DH,DL | /  |
| SE4  | 12.9           | 479   | 176     | 303, 125      | 479/303, <b>479/125</b> | 226, 288 | C <sub>21</sub> H <sub>20</sub> O <sub>13</sub>   | 479.0845                 | 479.0831  | -2.89          | $\Delta^*$ pentahydroxyflavanone- <i>O</i> -gluA           | /     | DH,DL | /  |
| SE5  | 15.6           | 383   | 80      | 303, 177      | 383/303                 | 284, 344 | C <sub>15</sub> H <sub>12</sub> O <sub>10</sub> S | 383.008                  | 383.0078  | -0.41          | $\Delta^*$ pentahydroxyflavanone- <i>O</i> -Sul            | /     | DH    | /  |
| SE6  | 16.8           | 477   | 176     | 301, 151      | <b>477/301</b> ,477/125 | 250, 290 | C <sub>21</sub> H <sub>18</sub> O <sub>13</sub>   | 477.0696                 | 477.0675  | -4.47          | $\Delta^*$ pentahydroxyflavonol- <i>O</i> -gluA            | /     | DH,DL | /  |
| SE7  | 20.3           | 383   | 80      | 303, 177      | 383/303                 | 278, 334 | C <sub>15</sub> H <sub>12</sub> O <sub>10</sub> S | 383.0089                 | 383.0078  | -2.76          | $\Delta^*$ pentahydroxyflavanone- <i>O</i> -Sul            | /     | DH    | /  |
| SE8  | 20.6           | 303   | 18      | 125, 177      | <b>303/125</b> ,303/177 | 226, 290 | C <sub>15</sub> H <sub>12</sub> O <sub>7</sub>    | 303.0511                 | 303.051   | -0.24          | *pentahydroxyflavanone                                     | DH    | DH,DL | DH |
| SE9  | 21.8           | 381   | 80      | 301           | 381/301,381/175         | nd       | C <sub>15</sub> H <sub>10</sub> O <sub>10</sub> S | 380.9927                 | 380.9922  | -1.33          | $\Delta^*$ pentahydroxyflavonol- <i>O</i> -Sul             | /     | DH,DL | /  |
| SE10 | 22.6           | 601   | 176     | 345, 425      | <b>601/425</b> ,601/345 | nd       | C <sub>23</sub> H <sub>22</sub> O <sub>17</sub> S | 601.0514                 | 601.0505  | -1.51          | $\Delta$ viscidulin III- <i>O</i> -gluA- <i>O</i> -Sul     | DH,DL | DH,DL | /  |
| SE11 | 23.0           | 577   | 120     | 427           | 577/457                 | nd       | C <sub>27</sub> H <sub>30</sub> O <sub>14</sub>   | 577.1563                 | 577.1566  | -0.15          | chrysin 6,8-di- <i>C</i> -glucoside                        | DH,DL | DH,DL | DH |
| SE12 | 25.8           | 521   | 176     | 345, 330      | 521/345                 | 200, 264 | C <sub>23</sub> H <sub>22</sub> O <sub>14</sub>   | 521.0949                 | 521.0937  | -2.34          | $\Delta$ viscidulin III- <i>O</i> -gluA                    | /     | DH,DL | /  |
| SE13 | 27.6           | 301   | 176     | 125, 175      | <b>301/125</b> ,301/175 | 302, 344 | C <sub>15</sub> H <sub>10</sub> O <sub>7</sub>    | 301.0359                 | 301.0354  | -1.73          | *pentahydroxyflavonol                                      | /     | DH,DL | DH |
| SE14 | 28.2           | 547   | 120, 90 | 427, 295, 457 | 547/427,547/457         | 272, 324 | C <sub>26</sub> H <sub>28</sub> O <sub>13</sub>   | 547.1478                 | 547.1457  | -3.8           | *chrysin 6- <i>C</i> -ara-8- <i>C</i> -glu                 | DH,DL | DH,DL | DH |
| SE15 | 29.5           | 547   | 120, 90 | 427, 295, 457 | 547/427,547/457         | 272, 324 | C <sub>26</sub> H <sub>28</sub> O <sub>13</sub>   | 547.1481                 | 547.1457  | -4.35          | isomer of chrysin 6- <i>C</i> -ara-8- <i>C</i> -glu        | DH,DL | DH,DL | DH |
| SE16 | 31.4           | 521   | 176     | 345, 330      | 521/345                 | 212, 268 | C <sub>23</sub> H <sub>22</sub> O <sub>14</sub>   | 521.0939                 | 521.0937  | -0.42          | $\Delta$ viscidulin III- <i>O</i> -gluA                    | DH,DL | DH    | /  |
| SE17 | 31.6           | 461   | 176     | 285           | 461/285                 | 280, 335 | C <sub>21</sub> H <sub>18</sub> O <sub>12</sub>   | 461.0732                 | 461.0725  | -1.41          | * scutellarin                                              | /     | DH    | /  |
| SE18 | 32.0           | 605   | 176     | 253,429       | 605/253,605/429         |          | C <sub>27</sub> H <sub>26</sub> O <sub>16</sub>   | 605.1166                 | 605.1148  | -2.96          | $\Delta^*$ chrysin-di- <i>O</i> -gluA                      | DH,DL | DH,DL | /  |
| SE19 | 32.5           | 547   | 120, 90 | 427, 295, 457 | 547/427,547/457         | 274, 314 | C <sub>26</sub> H <sub>28</sub> O <sub>13</sub>   | 547.1482                 | 547.1457  | -4.53          | isomer of chrysin 6- <i>C</i> -ara-8- <i>C</i> -glu        | DH,DL | DH,DL | DH |
| SE20 | 34.8           | 547   | 120, 90 | 427, 295, 457 | 547/427,547/457         | 274, 324 | C <sub>26</sub> H <sub>28</sub> O <sub>13</sub>   | 547.1478                 | 547.1457  | -3.8           | isomer of chrysin 6- <i>C</i> -ara-8- <i>C</i> -glu        | DH    | DH,DL | DH |
| SE21 | 39.4           | 607   | 176     | 269           | <b>607/431</b> ,607/269 | 272, 312 | C <sub>27</sub> H <sub>28</sub> O <sub>16</sub>   | 607.1309                 | 607.1305  | -0.73          | $\Delta^*$ baicalein-7- <i>O</i> -glu- <i>O</i> -gluA      | DH,DL | DH,DL | /  |
| SE22 | 40.1           | 621   | 176     | 269           | <b>621/445</b> ,621/269 | 272, 310 | C <sub>27</sub> H <sub>26</sub> O <sub>17</sub>   | 621.112                  | 621.1097  | -3.66          | $\Delta^*$ baicalein-di- <i>O</i> -gluA                    | DH,DL | DH,DL | /  |
| SE23 | 43.5           | 635   | 176     | 459           | <b>635/459</b> ,635/283 | 266, 308 | C <sub>28</sub> H <sub>28</sub> O <sub>17</sub>   | 635.1284                 | 635.1254  | -4.76          | $\Delta^*$ wogonin-di- <i>O</i> -gluA                      | DH,DL | DH,DL | /  |
| SE24 | 43.6           | 425   | 80      | 345, 330      | 425/345                 | 224, 264 | C <sub>17</sub> H <sub>14</sub> O <sub>11</sub> S | 425.0194                 | 425.0184  | -2.33          | $\Delta$ viscidulin III- <i>O</i> -Sul                     | DH,DL | DH,DL | /  |
| SE25 | 44.0           | 577   | 176     | 401           | 577/401                 | nd       | C <sub>26</sub> H <sub>26</sub> O <sub>15</sub>   | 577.1221                 | 577.1199  | -3.82          | $\Delta$ apigenin-8- <i>C</i> -ara- <i>O</i> -gluA         | /     | DH,DL | /  |
| SE26 | 44.1           | 561   | 176     | 385, 295, 325 | 561/385                 | 272, 302 | C <sub>26</sub> H <sub>26</sub> O <sub>14</sub>   | 561.1277                 | 561.125   | -4.84          | $\Delta^*$ chrysin 6- <i>C</i> -ara- <i>O</i> -gluA        | DH    | DH    | /  |
| SE27 | 46.7           | 651   | 176     | 299, 475      | 651/475,651/299         | 278, 318 | C <sub>28</sub> H <sub>28</sub> O <sub>18</sub>   | 651.1228                 | 651.1203  | -3.85          | $\Delta^*$ lateriflorein 7- <i>O</i> -gluA- <i>O</i> -gluA | DH,DL | DH,DL | /  |
| SE28 | 50.7           | 345   | 15      | 330, 297      | <b>345/315</b> ,345/330 | 222, 264 | C <sub>17</sub> H <sub>14</sub> O <sub>8</sub>    | 345.0626                 | 345.0616  | -2.92          | viscidulin III                                             | /     | DH,DL | DH |

|      |      |     |         |          |                         |          |                                                   |          |          |       |                                                  |       |       |    |
|------|------|-----|---------|----------|-------------------------|----------|---------------------------------------------------|----------|----------|-------|--------------------------------------------------|-------|-------|----|
| SE29 | 54.2 | 445 | 176     | 269      | 445/269                 | 272, 310 | C <sub>21</sub> H <sub>18</sub> O <sub>11</sub>   | 445.0797 | 445.0776 | -4.63 | Δ*baicalin                                       | DH,DL | DH,DL | DH |
| SE30 | 54.6 | 525 | 80      | 445, 269 | 525/269,525/445,        | nd       | C <sub>21</sub> H <sub>18</sub> O <sub>14</sub> S | 525.0368 | 525.0344 | -4.47 | Δnorwogonin- <i>O</i> -Sul                       | DH,DL | DH,DL | DH |
| SE31 | 55.5 | 539 | 80      |          | 539/283                 | nd       | C <sub>22</sub> H <sub>20</sub> O <sub>14</sub> S | 539.0525 | 539.0501 | -4.44 | Δwogonin- <i>O</i> -gluA- <i>O</i> -Sul          | DH    | DH    | /  |
| SE32 | 56.3 | 509 | 80, 176 | 253      | 509/429,509/333,        | nd       | C <sub>21</sub> H <sub>18</sub> O <sub>13</sub> S | 509.0415 | 509.0395 | -3.85 | Δchrysin- <i>O</i> -gluA- <i>O</i> -Sul          | DH    | DH    | /  |
| SE33 | 57.0 | 385 | 90      | 295      | 385/295                 | 274, 316 | C <sub>20</sub> H <sub>18</sub> O <sub>8</sub>    | 385.0945 | 385.0929 | -4.17 | *chrysin 6- <i>C</i> -ara                        | DH    | DH    | DH |
| SE34 | 57.2 | 459 | 176     | 283, 268 | 459/283                 | 222, 266 | C <sub>22</sub> H <sub>20</sub> O <sub>11</sub>   | 459.0941 | 459.0933 | -1.77 | Δ*wogonin-5- <i>O</i> -gluA                      | DH,DL | DH,DL | /  |
| SE35 | 57.7 | 555 | 80      | 475, 299 | <b>555/475</b> ,555/299 | nd       | C <sub>22</sub> H <sub>20</sub> O <sub>15</sub> S | 555.0474 | 555.045  | -4.29 | Δ*lateriflorein 7- <i>O</i> -gluA- <i>O</i> -Sul | DH,DL | DH,DL | /  |
| SE36 | 57.8 | 525 | 80, 176 | 269, 349 | 525/269                 | nd       | C <sub>21</sub> H <sub>18</sub> O <sub>14</sub> S | 525.0363 | 525.0344 | -3.52 | Δnorwogonin- <i>O</i> -Sul                       | DH,DL | /     | /  |
| SE37 | 57.9 | 445 | 176     | 269      | 445/269                 | 224, 274 | C <sub>21</sub> H <sub>18</sub> O <sub>11</sub>   | 445.0787 | 445.0776 | -3.73 | Δ norwogonin- <i>O</i> -gluA                     | /     | DH,DL | /  |
| SE38 | 58.0 | 429 | 176     | 253      | 429/253                 | nd       | C <sub>21</sub> H <sub>18</sub> O <sub>10</sub>   | 429.083  | 429.0827 | -0.65 | Δ*chrysin- <i>O</i> -gluA                        | DH    | DH    | /  |
| SE39 | 58.0 | 539 | 80      | 283      | 539/283                 | 222, 274 | C <sub>22</sub> H <sub>20</sub> O <sub>14</sub> S | 539.0525 | 539.0501 | -4.44 | Δ*oroxylin A-7- <i>O</i> -gluA- <i>O</i> -Sul    | DH,DL | DH,DL | /  |
| SE40 | 58.4 | 511 | 80,     | 269, 431 | 511/431                 | 272, 310 | C <sub>21</sub> H <sub>20</sub> O <sub>13</sub> S | 511.0576 | 511.0552 | -4.72 | Δbaicalein- <i>O</i> -glu- <i>O</i> -Sul         | DH,DL | DH,DL | /  |
| SE41 | 58.8 | 445 | 176     | 269      | 445/269                 | 226, 270 | C <sub>21</sub> H <sub>18</sub> O <sub>11</sub>   | 445.0787 | 445.0776 | -2.39 | Δnorwogonin- <i>O</i> -gluA                      | DH,DL | DH,DL | /  |
| SE42 | 58.8 | 429 | 176     | 253      | 429/253                 | nd       | C <sub>21</sub> H <sub>18</sub> O <sub>10</sub>   | 429.0832 | 429.0827 | -1.12 | Δ*chrysin-7- <i>O</i> -gluA                      | DH,DL | DH    | DH |
| SE43 | 58.9 | 525 | 80      |          | 525/269                 | nd       | C <sub>21</sub> H <sub>18</sub> O <sub>14</sub> S | 525.0367 | 525.0344 | -4.28 | Δ*baicalein- <i>O</i> -gluA                      | DH,DL | DH,DL | /  |
| SE44 | 59.1 | 425 | 80      | 345, 330 | 425/345                 | 224, 264 | C <sub>17</sub> H <sub>14</sub> O <sub>11</sub> S | 425.0198 | 425.0184 | -3.27 | Δviscidulin III- <i>O</i> -Sul                   | DH    | DH,DL | /  |
| SE45 | 59.2 | 459 | 176     | 283      | 459/283                 | 262, 324 | C <sub>22</sub> H <sub>20</sub> O <sub>11</sub>   | 459.0928 | 459.0933 | 1.05  | Δ* oroxylin A-7- <i>O</i> -gluA                  | DH,DL | DH,DL | /  |
| SE46 | 59.4 | 475 | 176     | 299      | 475/299                 | 278, 318 | C <sub>22</sub> H <sub>20</sub> O <sub>12</sub>   | 475.0883 | 475.0882 | -0.21 | Δ*lateriflorein 7- <i>O</i> -gluA- <i>O</i> -Sul | DH,DL | DH,DL | /  |
| SE47 | 59.6 | 431 | 162     | 269      | 431/269                 | 274, 310 | C <sub>21</sub> H <sub>20</sub> O <sub>10</sub>   | 431.0992 | 431.0984 | -1.92 | baicalein- <i>O</i> -glu                         | /     | DH,DL | /  |
| SE48 | 59.8 | 525 | 80      | 269      | 525/269                 | nd       | C <sub>21</sub> H <sub>18</sub> O <sub>14</sub> S | 525.0361 | 525.0344 | -3.14 | Δ*baicalein- <i>O</i> -Sul                       | DH,DL | /     | /  |
| SE49 | 59.9 | 445 | 176     | 269      | 445/269                 | 270, 316 | C <sub>21</sub> H <sub>18</sub> O <sub>11</sub>   | 445.0791 | 445.0776 | -3.28 | Δ*baicalein- <i>O</i> -gluA                      | DH,DL | DH,DL | DH |
| SE50 | 60.2 | 481 | 80      | 401      | 481/401                 |          | C <sub>20</sub> H <sub>18</sub> O <sub>12</sub> S | 481.0462 | 481.0446 | -3.28 | Δapigenin-8- <i>C</i> -ara- <i>O</i> -Sul        | DH,DL | DH,DL | /  |
| SE51 | 60.3 | 459 | 176     | 283, 268 | 459/283                 | 274, 344 | C <sub>22</sub> H <sub>20</sub> O <sub>11</sub>   | 459.0949 | 459.0933 | -3.51 | Δ*wogonoside                                     | DH,DL | DH    | /  |
| SE52 | 63.9 | 299 | 15      |          | 299/284                 | 280, 325 | C <sub>16</sub> H <sub>12</sub> O <sub>6</sub>    | 299.0567 | 299.0561 | -1.96 | lateriflorein                                    | /     | DH,DL | /  |
| SE53 | 64.2 | 269 | 28      | 241      | <b>269/241</b> ,269/251 | 278, 324 | C <sub>15</sub> H <sub>10</sub> O <sub>5</sub>    | 269.0454 | 269.0455 | 0.54  | *baicalein                                       | DH,DL | DH,DL | DH |
| SE54 | 69.6 | 283 | 15      | 268, 119 | 283/268                 | 276      | C <sub>16</sub> H <sub>12</sub> O <sub>5</sub>    | 283.0613 | 283.0612 | -0.36 | *wogonin                                         | DH,DL | DH,DL | DH |
| SE55 | 69.8 | 253 |         | 101, 151 | 253/101, <b>253/151</b> | 255, 290 | C <sub>15</sub> H <sub>10</sub> O <sub>4</sub>    | 253.0505 | 253.0506 | 0.52  | *chrysin                                         | /     | DH,DL | DH |
| SE56 | 70.7 | 283 | 15      | 268      | <b>283/268</b> ,283/137 | 270, 320 | C <sub>16</sub> H <sub>12</sub> O <sub>5</sub>    | 283.0613 | 283.0612 | -0.36 | *oroxylin A                                      | DH,DL | DH,DL | DH |

**Table 7S.** Metabolites of Coptidis Rhizoma extract.

| No.  | $t_R$<br>(min) | $m/z$ | NL     | PR      | SRM                    | UV<br>(nm) | Formula                                          | HRMS, [M-H] <sup>-</sup> |           |                | Identification                                  | P     | U     | F  |
|------|----------------|-------|--------|---------|------------------------|------------|--------------------------------------------------|--------------------------|-----------|----------------|-------------------------------------------------|-------|-------|----|
|      |                |       |        |         |                        |            |                                                  | Measured                 | Predicted | $\Delta$ (ppm) |                                                 |       |       |    |
| CE1  | 8.8            | 534   | 176    | 358     | <b>534/358,534/340</b> | 224,282    | C <sub>26</sub> H <sub>31</sub> NO <sub>11</sub> | 534.1976                 | 534.1970  | -1.15          | $\Delta$ monohydroxymagnoflorine-O-gluA         | DH,DL | DH,DL | /  |
| CE2  | 9.6            | 534   | 176    | 358     | <b>534/358,534/340</b> | 222,280    | C <sub>26</sub> H <sub>31</sub> NO <sub>11</sub> | 534.1982                 | 534.1970  | -2.27          | $\Delta$ monohydroxymagnoflorine-O-gluA         | DH,DL | DH,DL | /  |
| CE3  | 12.8           | 548   | 176    | 372     | <b>548/372,548/354</b> | 256,312    | C <sub>27</sub> H <sub>33</sub> NO <sub>11</sub> | 548.2144                 | 548.2126  | -3.22          | $\Delta$ methoxymagnoflorine-O-gluA             | DH,DL | DH,DL | /  |
| CE4  | 13.2           | 534   | 176    | 358     | <b>534/358,534/340</b> | 224,272    | C <sub>26</sub> H <sub>31</sub> NO <sub>11</sub> | 534.1993                 | 534.1970  | -4.34          | $\Delta$ monohydroxymagnoflorine-O-gluA         | DH,DL | DH,DL | /  |
| CE5  | 14.0           | 518   | 176    | 342     | <b>518/342</b>         | 240,325    | C <sub>26</sub> H <sub>31</sub> NO <sub>10</sub> | 518.2034                 | 518.2021  | -2.57          | $\Delta$ *magnoflorine-O-gluA                   | DH,DL | DH,DL | /  |
| CE6  | 14.1           | 676   | 176    | 324     | <b>676/500,676/324</b> | nd         | C <sub>31</sub> H <sub>33</sub> NO <sub>16</sub> | 676.1906                 | 676.1872  | -4.87          | $\Delta$ demethyleneberberine-di-O-gluA         | DH,DL | DH,DL | /  |
| CE7  | 14.4           | 358   | 18     | 340     | <b>358/340,358/297</b> | 260,340    | C <sub>20</sub> H <sub>23</sub> NO <sub>5</sub>  | 358.1663                 | 358.1649  | -3.92          | monohydroxymagnoflorine                         | /     | DH,DL | /  |
| CE8  | 14.6           | 484   | 176    | 308     | <b>484/308</b>         | 240,325    | C <sub>24</sub> H <sub>21</sub> NO <sub>10</sub> | 484.1260                 | 484.1238  | -4.51          | $\Delta$ didemethylepiberberine-O-gluA          | DH,DL | DH,DL | /  |
| CE9  | 15.2           | 498   | 176    | 322     | <b>498/322,487/307</b> | 274,344    | C <sub>25</sub> H <sub>23</sub> NO <sub>10</sub> | 498.1399                 | 498.1395  | -0.86          | $\Delta$ *groenlandicine-3-O-gluA               | DH,DL | DH,DL | /  |
| CE10 | 15.5           | 342   | 45     | 297     | <b>342/297,342/280</b> | 235,270    | C <sub>20</sub> H <sub>23</sub> NO <sub>4</sub>  | 342.1714                 | 342.1700  | -4.15          | *magnoflorine                                   | DH,DL | DH,DL | /  |
| CE11 | 15.8           | 660   | 176    | 484     | <b>660/484,660/308</b> | nd         | C <sub>30</sub> H <sub>29</sub> NO <sub>16</sub> | 660.1569                 | 660.1559  | -1.5           | $\Delta$ didemethylberberine-di-O-gluA          | DH,DL | DH,DL | /  |
| CE12 | 18.0           | 548   | 176    | 372     | <b>548/372,548/354</b> | 240,330    | C <sub>27</sub> H <sub>33</sub> NO <sub>11</sub> | 548.2153                 | 548.2126  | -4.87          | $\Delta$ methoxymagnoflorine-O-gluA             | DH,DL | DH,DL | /  |
| CE13 | 18.3           | 310   | 15     | 295     | <b>310/295</b>         | nd         | C <sub>18</sub> H <sub>15</sub> NO <sub>4</sub>  | 310.1060                 | 310.1074  | 4.48           | tridemethylated palmatine                       | DH,DL | DH,DL | DH |
| CE14 | 19.6           | 372   | 18     | 354     | <b>372/354</b>         | 255,360    | C <sub>21</sub> H <sub>25</sub> NO <sub>5</sub>  | 372.1799                 | 372.1805  | 1.75           | methoxymagnoflorine                             | /     | DH    | /  |
| CE15 | 20.9           | 500   | 176,15 | 324,309 | <b>500/324,500/309</b> | 275,340    | C <sub>25</sub> H <sub>23</sub> NO <sub>10</sub> | 500.1576                 | 500.1551  | -4.96          | $\Delta$ demethyleneberberine-O-gluA            | DH,DL | DH,DL | /  |
| CE16 | 21.4           | 498   | 176    | 322     | <b>498/322,487/307</b> | 262,342    | C <sub>25</sub> H <sub>23</sub> NO <sub>10</sub> | 498.1418                 | 498.1395  | -4.68          | $\Delta$ thalifendine-10-O-gluA                 | DH,DL | DH,DL | /  |
| CE17 | 21.6           | 514   | 176,15 | 338     | <b>514/338,514/323</b> | 275,340    | C <sub>26</sub> H <sub>27</sub> NO <sub>10</sub> | 514.1714                 | 514.1708  | -1.22          | $\Delta$ 3-methoxydemethyleneberberine-2-O-gluA | DH,DL | DH,DL | /  |
| CE18 | 24.9           | 498   | 176    | 322     | <b>498/322,487/307</b> | 272,336    | C <sub>25</sub> H <sub>23</sub> NO <sub>10</sub> | 498.1419                 | 498.1395  | -4.88          | $\Delta$ berberrubine-9-O-gluA                  | DH,DL | DH,DL | /  |
| CE19 | 25.7           | 324   | 15     | 309     | <b>324/309</b>         | nd         | C <sub>19</sub> H <sub>17</sub> NO <sub>4</sub>  | 324.1243                 | 324.1230  | -3.92          | didemethylated palmatine                        | DH,DL | DH,DL | /  |
| CE20 | 26.1           | 324   | 15     | 309     | <b>324/309</b>         | nd         | C <sub>19</sub> H <sub>17</sub> NO <sub>4</sub>  | 324.1243                 | 324.1230  | -3.92          | didemethylated palmatine                        | DH    | DH,DL | /  |
| CE21 | 27.1           | 322   | 15     | 307     | <b>322/307</b>         | 262,340    | C <sub>19</sub> H <sub>15</sub> NO <sub>4</sub>  | 322.1087                 | 322.1074  | -4.1           | groenlandicine                                  | DH,DL | DH,DL | DH |
| CE22 | 27.6           | 484   | 176    | 308     | <b>484/308</b>         | 240,320    | C <sub>24</sub> H <sub>21</sub> NO <sub>10</sub> | 484.1260                 | 484.1238  | -4.51          | $\Delta$ didemethylberberine-O-gluA             | /     | DH    | /  |
| CE23 | 27.6           | 324   | 15     | 309     | <b>324/309</b>         | nd         | C <sub>19</sub> H <sub>17</sub> NO <sub>4</sub>  | 324.1244                 | 324.1230  | -4.23          | demethyleneberberine                            | DH,DL | DH,DL | DH |
| CE24 | 36.9           | 320   |        | 292     | <b>320/292</b>         | 260,345    | C <sub>19</sub> H <sub>13</sub> NO <sub>4</sub>  | 320.0931                 | 320.0917  | -4.28          | *coptisine                                      | DH,DL | DH,DL | DH |
| CE25 | 37.2           | 338   | 15     | 323     | <b>338/323,338/322</b> | 230,345    | C <sub>20</sub> H <sub>19</sub> NO <sub>4</sub>  | 338.1401                 | 338.1387  | -4.2           | 3-methoxydemethyleneberberine                   | DH,DL | DH,DL | DH |
| CE26 | 37.2           | 336   | 15     | 321     | <b>336/321</b>         | 260,345    | C <sub>20</sub> H <sub>17</sub> NO <sub>4</sub>  | 336.1247                 | 336.1230  | -4.97          | *epiberberine                                   | DH,DL | DH,DL | DH |
| CE27 | 37.6           | 322   | 15     | 307     | <b>322/307</b>         | 260,345    | C <sub>19</sub> H <sub>15</sub> NO <sub>4</sub>  | 322.1088                 | 322.1074  | -4.41          | thalifendine                                    | DH,DL | DH,DL | DH |
| CE28 | 38.7           | 338   | 15     | 323     | <b>338/323</b>         | 230,340    | C <sub>20</sub> H <sub>19</sub> NO <sub>4</sub>  | 338.1403                 | 338.1387  | -4.79          | *jatrorrhizine                                  | DH,DL | DH,DL | DH |

|      |      |     |    |     |                |         |                                                 |          |          |       |              |       |       |    |
|------|------|-----|----|-----|----------------|---------|-------------------------------------------------|----------|----------|-------|--------------|-------|-------|----|
| CE29 | 43.7 | 322 | 15 | 307 | <b>322/307</b> | 275,330 | C <sub>19</sub> H <sub>15</sub> NO <sub>4</sub> | 322.1088 | 322.1074 | -4.41 | berberrubine | /     | DH,DL | DH |
| CE30 | 49.5 | 336 | 15 | 321 | <b>336/321</b> | 265,345 | C <sub>20</sub> H <sub>17</sub> NO <sub>4</sub> | 336.1245 | 336.1230 | -4.37 | *berberine   | DH,DL | DH,DL | DH |
| CE31 | 52.1 | 352 | 15 | 337 | <b>352/337</b> | 270,350 | C <sub>21</sub> H <sub>21</sub> NO <sub>4</sub> | 352.1559 | 352.1543 | -4.46 | *palmatine   | DH,DL | DH,DL | DH |

**Table 8S.** Instrmt parameters for SRM scans.

| No. | SRM     | CE  | SID | No. | SRM     | CE  | SID | No. | SRM     | CE  | SID | No. | SRM     | CE | SID |
|-----|---------|-----|-----|-----|---------|-----|-----|-----|---------|-----|-----|-----|---------|----|-----|
| 1   | 479/125 | 30  | 5   | 34  | 577/457 | 30  | 5   | 67  | 513/337 | 25  | 5   | 100 | 445/269 | 25 | 5   |
| 2   | 534/358 | -35 | -5  | 35  | 511/335 | 25  | 5   | 68  | 635/459 | 25  | 5   | 101 | 447/271 | 25 | 5   |
| 3   | 479/125 | 30  | 5   | 36  | 498/322 | -25 | -5  | 69  | 377/297 | 25  | 5   | 102 | 525/269 | 30 | 5   |
| 4   | 534/358 | -35 | -5  | 37  | 473/297 | 25  | 5   | 70  | 577/401 | 30  | 5   | 103 | 425/345 | 25 | 5   |
| 5   | 477/125 | 30  | 5   | 38  | 521/345 | 25  | 5   | 71  | 333/253 | 25  | 5   | 104 | 459/283 | 25 | 5   |
| 6   | 591/415 | 25  | 5   | 39  | 322/307 | -35 | -5  | 72  | 561/385 | 30  | 5   | 105 | 475/299 | 25 | 5   |
| 7   | 607/431 | 25  | 5   | 40  | 324/309 | -35 | -5  | 73  | 363/283 | 25  | 5   | 106 | 431/269 | 25 | 5   |
| 8   | 431/311 | 30  | 5   | 41  | 549/255 | 25  | 5   | 74  | 363/283 | 25  | 5   | 107 | 705/529 | 25 | 5   |
| 9   | 548/372 | -35 | -5  | 42  | 417/255 | 30  | 5   | 75  | 336/321 | -35 | -5  | 108 | 445/269 | 25 | 5   |
| 10  | 621/445 | 25  | 5   | 43  | 431/175 | 25  | 5   | 76  | 297/119 | 30  | 5   | 109 | 481/401 | 25 | 5   |
| 11  | 479/125 | 30  | 5   | 44  | 513/337 | 25  | 5   | 77  | 345/315 | 30  | 5   | 110 | 459/283 | 25 | 5   |
| 12  | 534/358 | -35 | -5  | 45  | 547/427 | 25  | 5   | 78  | 352/337 | -35 | -5  | 111 | 337/257 | 25 | 5   |
| 13  | 495/415 | 25  | 5   | 46  | 605/429 | 30  | 5   | 79  | 443/267 | 25  | 5   | 112 | 515/339 | 25 | 5   |
| 14  | 525/445 | -30 | -5  | 47  | 431/175 | 25  | 5   | 80  | 487/311 | 25  | 5   | 113 | 391/311 | 25 | 5   |
| 15  | 518/342 | 25  | 5   | 48  | 497/241 | 30  | 5   | 81  | 445/269 | 25  | 5   | 114 | 271/151 | 30 | 5   |
| 16  | 593/417 | 25  | 5   | 49  | 521/345 | 25  | 5   | 82  | 525/445 | 25  | 5   | 115 | 311/119 | 30 | 5   |
| 17  | 511/431 | 25  | 5   | 50  | 497/241 | 30  | 5   | 83  | 433/257 | 25  | 5   | 116 | 337/257 | 25 | 5   |
| 18  | 484/308 | -30 | -5  | 51  | 473/297 | 25  | 5   | 84  | 255/119 | 30  | 5   | 117 | 299/284 | 30 | 5   |
| 19  | 342/297 | -35 | -5  | 52  | 445/269 | 25  | 5   | 85  | 487/311 | 25  | 5   | 118 | 837/351 | 30 | 5   |
| 20  | 415/295 | 25  | 5   | 53  | 605/253 | 25  | 5   | 86  | 253/225 | 30  | 5   | 119 | 269/241 | 30 | 5   |
| 21  | 660/308 | -35 | -5  | 54  | 547/427 | 25  | 5   | 87  | 509/253 | 30  | 5   | 120 | 257/151 | 30 | 5   |
| 22  | 509/333 | 25  | 5   | 55  | 429/309 | 30  | 5   | 88  | 433/257 | 25  | 5   | 121 | 257/135 | 30 | 5   |
| 23  | 547/295 | 30  | 5   | 56  | 561/309 | 30  | 5   | 89  | 385/295 | 25  | 5   | 122 | 821/351 | 30 | 5   |
| 24  | 445/325 | 30  | 5   | 57  | 497/241 | 30  | 5   | 90  | 283/268 | 30  | 5   | 123 | 267/252 | 30 | 5   |
| 25  | 525/325 | 30  | 5   | 58  | 320/292 | -35 | -5  | 91  | 459/283 | 25  | 5   | 124 | 269/254 | 30 | 5   |
| 26  | 577/325 | 30  | 5   | 59  | 338/323 | -35 | -5  | 92  | 555/475 | 25  | 5   | 125 | 347/267 | 25 | 5   |
| 27  | 548/372 | -35 | -5  | 60  | 336/321 | -35 | -5  | 93  | 525/269 | 30  | 5   | 126 | 283/268 | 30 | 5   |
| 28  | 445/325 | 30  | 5   | 61  | 322/307 | -35 | -5  | 94  | 445/269 | 25  | 5   | 127 | 253/151 | 30 | 5   |
| 29  | 429/253 | 25  | 5   | 62  | 338/323 | -35 | -5  | 95  | 429/253 | 25  | 5   | 128 | 367/309 | 30 | 5   |
| 30  | 500/324 | -30 | -5  | 63  | 607/431 | 25  | 5   | 96  | 539/283 | 30  | 5   | 129 | 283/268 | 30 | 5   |
| 31  | 498/322 | -20 | -5  | 64  | 621/445 | 25  | 5   | 97  | 511/431 | 25  | 5   | 130 | 365/307 | 30 | 5   |
| 32  | 514/338 | -30 | -5  | 65  | 459/283 | 25  | 5   | 98  | 337/257 | 25  | 5   | 131 | 469/425 | 30 | 5   |
| 33  | 601/425 | 30  | 5   | 66  | 417/241 | 25  | 5   | 99  | 321/241 | 25  | 5   |     |         |    |     |

**Table 9S.** Source herb and *in vivo* distribution of GQD metabolites.

|                 | Sample | Total | P  | S  | C  | G  |
|-----------------|--------|-------|----|----|----|----|
| High dosage     | Plasma | 96    | 39 | 28 | 13 | 17 |
|                 | Urine  | 109   | 38 | 36 | 21 | 15 |
|                 | Feces  | 20    | 8  | 4  | 6  | 2  |
| Total           |        | 131   | 44 | 42 | 22 | 23 |
| Clinical dosage | Plasma | 77    | 34 | 22 | 13 | 8  |
|                 | Urine  | 90    | 36 | 25 | 19 | 11 |
|                 | Total  | 112   | 44 | 31 | 21 | 16 |
